# Supplementary material
Source: PubMed Central journal article supplement (PMC3098134)

## Supplemental Material

### Supplemental Methods

#### *CMR*

CMR examinations were performed on a 3 Tesla MR scanner (Trio, Siemens Healthcare, Erlangen, Germany). After piloting, steady-state free precession (SSFP) cine images using retrospective gating (TE / TR = 1.4 / 3.2 ms; flip angle = 50°; pixel size: 1.6 x 1.6 mm; slice thickness: 8 mm) were acquired. The short axis stack was acquired parallel to the atrio-ventricular groove in 1 cm increments (slice thickness 8 mm, inter-slice gap 2 mm). Identical short axis images at matching slice position with cine images were acquired using T2W and LGE imaging.

Edema imaging was performed using a T2 prep-SSFP single shot sequence<sup>1</sup> (TE / TR = 1 / 4.1 ms; effective TE = 60 ms; flip angle = 90°; pixel size: 2.1 x 2.8 mm; slice thickness: 8 mm).

LGE-CMR was performed with a T1-weighted segmented inversion-recovery gradient echo-phase sensitive-inversion recovery (GRE\_PSIR) sequence (echo time 2.5 ms, voxel size 1.8 x 1.4 x 8 mm, flip angle 20°) 5 to 10 minutes after the administration of 0.1 mmol / kg contrast agent (Gadodiamide, Omniscan<sup>TM</sup>, GE Healthcare, Amersham, UK).

### *Image co-registration and post-processing analysis*

Cine, edema and LGE images were acquired parallel to the AV groove and were radially aligned to the position of the papillary muscles. CMR image sets acquired at different time points were analyzed in random order by observers blinded to the origin of the image.

### *Quantification of LV volumes and damaged myocardium*

Left ventricular volumes and ejection fractions were calculated from the short axis images as previously described.<sup>2</sup> Injured fractions (injured myocardium volume / slice volume) in each short axis slice both for LGE and T2W images were quantified using computer assisted planimetry in MATLAB version 7.3.0.267 (Natick, USA) by a single experienced operator (ED).

Apical slices were not included in LGE and T2W analysis due to partial volume effects.

For objective quantification of edema or LGE, a reference region of interest (ROI) was placed in remote myocardium. The signal intensity threshold indicating edema/LGE was imposed 2 standard deviations above the mean intensity of the reference ROI, as previously described.<sup>3</sup>

Microvascular obstruction (MVO) / hemorrhage was defined as the low intensity core within an area of LGE or edema. Both MVO and haemorrhage were included in the measurement of the areas of infarction or edema.

A second reader blinded to the results of the first and to the results of PCI and CMR imaging, analysed edema images to assess interobserver variability on 20 randomly selected patients.

The index of myocardial salvage was calculated as difference in area between edema and late gadolinium divided by the area of edema. Our standardised methods for analysing and calculating LGE, along with reproducibility, have been reported previously.<sup>4,5</sup>

*Semi-quantitative assessment of regional function, edema and late gadolinium*

Myocardial anatomical segmentation was according to the American Heart Association 17 segment model (excluding segment 17, true apex).<sup>6</sup> Semi-quantitative assessments of wall motion abnormalities, myocardial edema and LGE were undertaken by an experienced observer (E.D.) using Argus software (Version 2002B, Siemens Medical Solutions). For regional function, segments were graded: 1 = normal; 2 = hypokinetic; 3 = akinetic or 4 = dyskinetic. Change in regional contraction was defined as a difference of  $\geq 1$  functional grade between time points. Wall motion score index (WMSI) was defined as the sum of segmental scores divided by the number of segments scored, as previously published.<sup>7</sup>

The extent of LGE within each segment was estimated visually and categorized according to the percentage hyperenhanced area of each segment:<sup>8</sup> 0 = no LGE; 1 = 1 - 25% LGE; 2 = 26 - 50% LGE; 3 = 51 - 75% LGE and 4 = > 75%. Similarly, the extent of edema per segment was also assessed visually and categorized for each segment according to an equivalent scoring system. A second blinded reader scored the images for LGE / edema and wall motion in 20 patients. The infarct size score (% LVscore) was also calculated based on the scoring system as previously shown<sup>9</sup> (sum of all the scores throughout the LV (range 0 to 4) / total number of segments x 4).

## Supplemental Table

|              | Segments edema +<br>n (%) | Segments LGE +<br>n (%) | Segments WMA +<br>n (%) | Total segments<br>analyzed per each<br>modality |
|--------------|---------------------------|-------------------------|-------------------------|-------------------------------------------------|
| Time point 1 | 151 (35%)                 | 133 (31%)               | 139 (32%)               | 428                                             |
| Time point 2 | 157 (37%)                 | N/A                     | 107 (25%)               | 428                                             |
| Time point 3 | 152 (36%)                 | N/A                     | 95 (22%)                | 428                                             |
| Time point 4 | 25 (6%)                   | 100 (29%)               | 94 (23%)                | 336                                             |

## **Supplemental Figure Legend**

### **Figure. Patient flow.**

Disposition of patients with STEMI recruited to this study, indicating numbers at each follow-up CMR examination up to six months and reasons for loss from study.

## References

1. Kellman P, Aletras AH, Mancini C, McVeigh ER, Arai AE. T2-prepared ssfp improves diagnostic confidence in edema imaging in acute myocardial infarction compared to turbo spin echo. *Magn Reson Med.* 2007;57:891-897
2. Karamitsos TD, Hudsmith LE, Selvanayagam JB, Neubauer S, Francis JM. Operator induced variability in left ventricular measurements with cardiovascular magnetic resonance is improved after training. *J Cardiovasc Magn Reson.* 2007;9:777-783
3. Berry C, Kellman P, Mancini C, Chen MY, Bandettini WP, Lowrey T, Hsu LY, Aletras AH, Arai AE. Magnetic resonance imaging delineates the ischemic area-at-risk and myocardial salvage in patients with acute myocardial infarction. *Circ Cardiovasc Imaging.* 2010;3:527-535
4. Hudsmith LE, Steffen EP, Damian JT, Jane MF, Adrian SHC, Kieran C, Joseph BS, Matthew DR, Stefan N. Determination of cardiac volumes and mass with flash and ssfp cine sequences at 1.5 vs. 3 tesla: A validation study. *Journal of Magnetic Resonance Imaging.* 2006;24:312-318
5. Porto I, Selvanayagam JB, Van Gaal WJ, Prati F, Cheng A, Channon K, Neubauer S, Banning AP. Plaque volume and occurrence and location of periprocedural myocardial necrosis after percutaneous coronary intervention: Insights from delayed-enhancement magnetic resonance imaging, thrombolysis in myocardial infarction myocardial perfusion grade analysis, and intravascular ultrasound. *Circulation.* 2006;114:662-669
6. Cerqueira MD, Weissman NJ, Dilsizian V, Jacobs AK, Kaul S, Laskey WK, Pennell DJ, Rumberger JA, Ryan T, Verani MS. Standardized myocardial segmentation and

nomenclature for tomographic imaging of the heart: A statement for healthcare professionals from the cardiac imaging committee of the council on clinical cardiology of the american heart association. *Circulation*. 2002;105:539-542

7. Dall'Armellina E, Morgan TM, Mandapaka S, Ntim W, Carr JJ, Hamilton CA, Hoyle J, Clark H, Clark P, Link KM, Case D, Hundley WG. Prediction of cardiac events in patients with reduced left ventricular ejection fraction with dobutamine cardiovascular magnetic resonance assessment of wall motion score index. *Journal of the American College of Cardiology*. 2008;52:279-286
8. Kim RJ, Wu E, Rafael A, Chen EL, Parker MA, Simonetti O, Klocke FJ, Bonow RO, Judd RM. The use of contrast-enhanced magnetic resonance imaging to identify reversible myocardial dysfunction. *N Engl J Med*. 2000;343:1445-1453
9. Choi KM, Kim RJ, Gubernikoff G, Vargas JD, Parker M, Judd RM. Transmural extent of acute myocardial infarction predicts long-term improvement in contractile function. *Circulation*. 2001;104:1101-1107

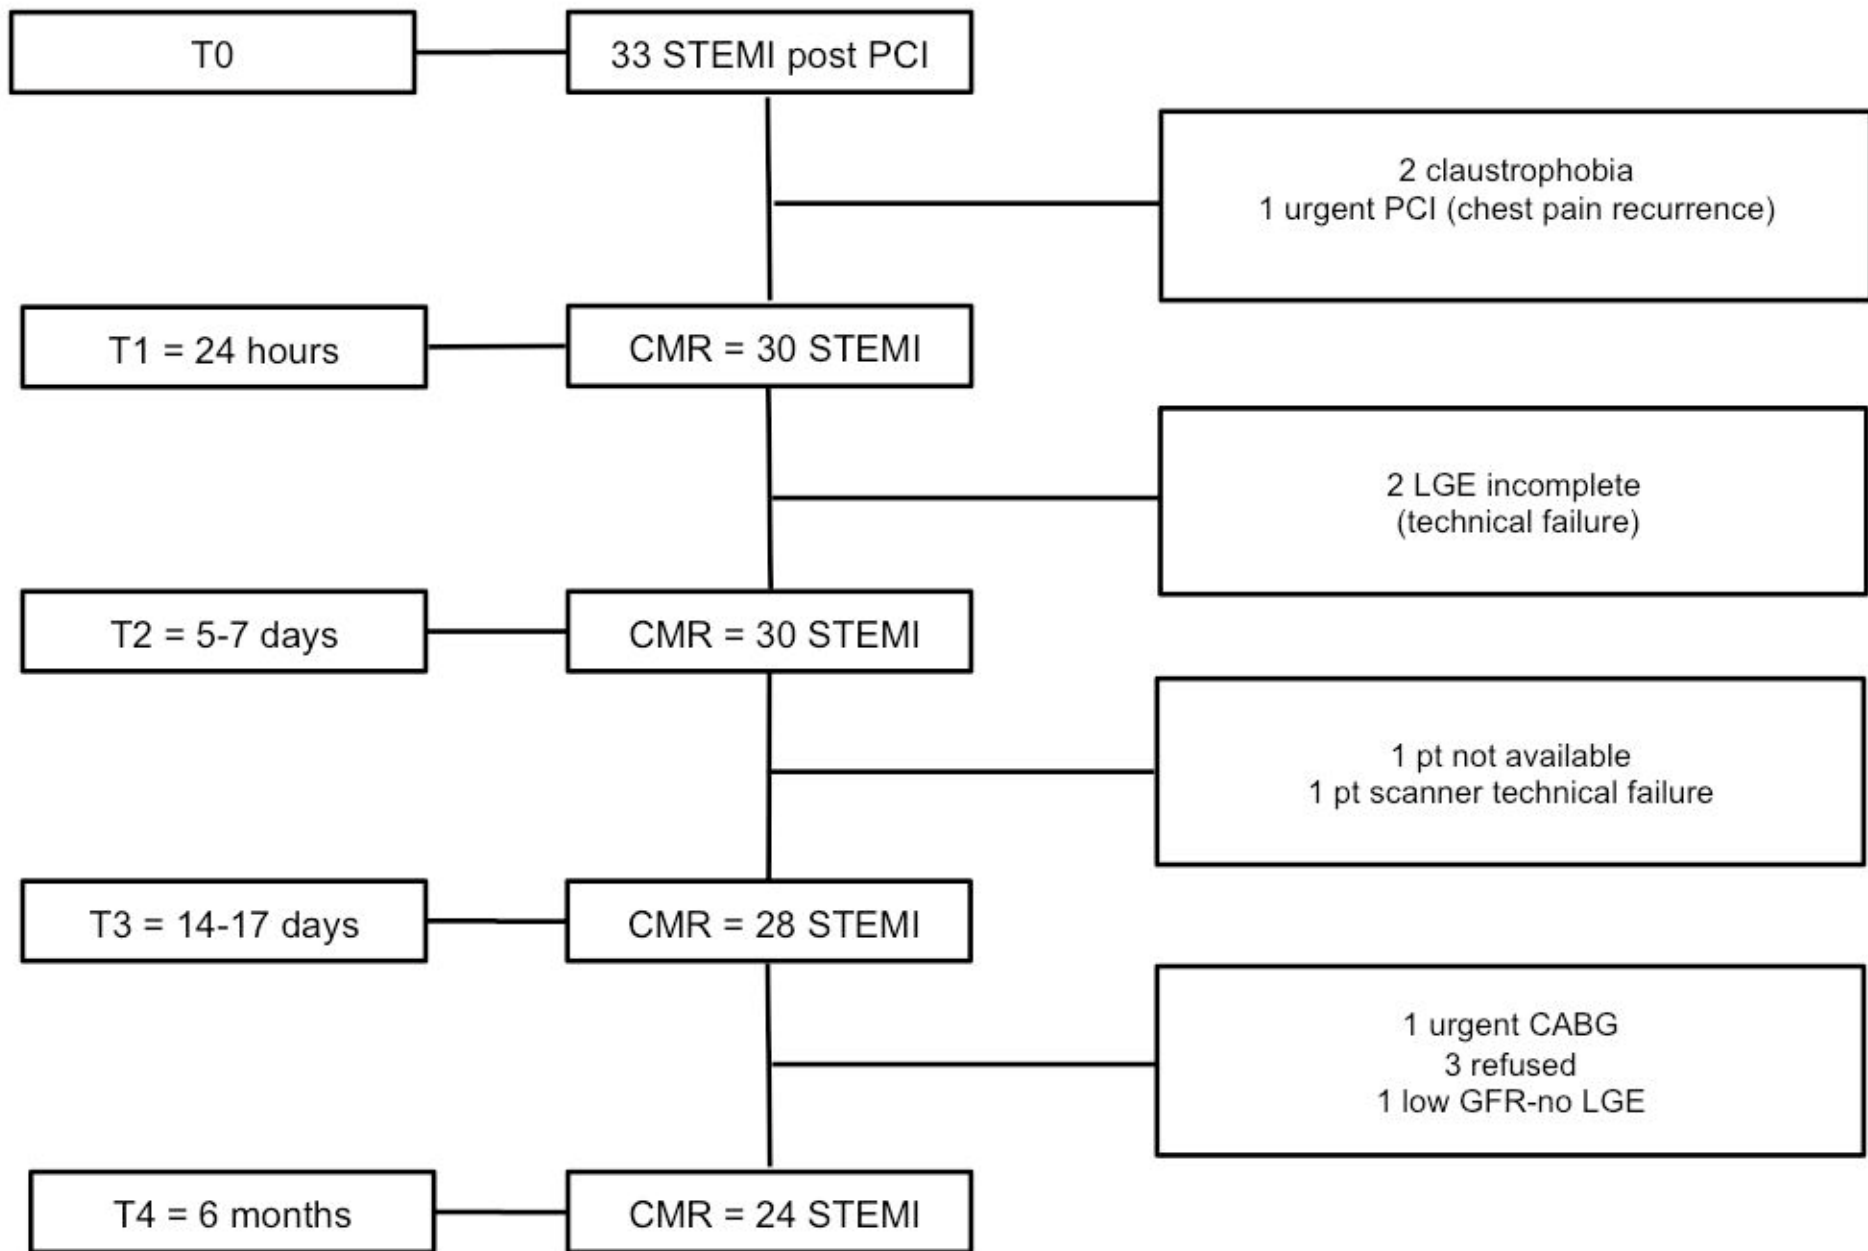

Supplement: NIHMS35336-supplement-1.pdf [file NIHMS35336-supplement-1.pdf]
